# Supplementary material for: Enhanced clamshell swimming with asymmetric beating at low Reynolds number
Source: Royal Society of Chemistry journal article supplement (doi:10.1039/d2sm00292b), 2022-01-01
Supplement: d2sm00292b1.zip [file d2sm00292b1.zip]

Video1:

Reciprocal motion of the elastic clamshell with relatively rigid filaments.

Video2:

Velocity-optimal elastic clamshell with zero intrinsic curvature.

Video3:

Enhanced swimming performance of the elastic clamshell with a negative intrinsic curvature.

Video4:

Reciprocal motion of the segmental model with zero response torque.

Video5:

Segmental model with a linear response torque.

Video6:

Enhanced swimming performance of the segmental model with a biased response torque.
